# Supplementary material for: Chromatin Morphology in Human Germinal Vesicle Oocytes and Their Competence to Mature in Stimulated Cycles
Source: MDPI journal article supplement (doi:10.3390/cells12151976), 2023-07-31
Supplement: s1 [file s1]

Supplement 1

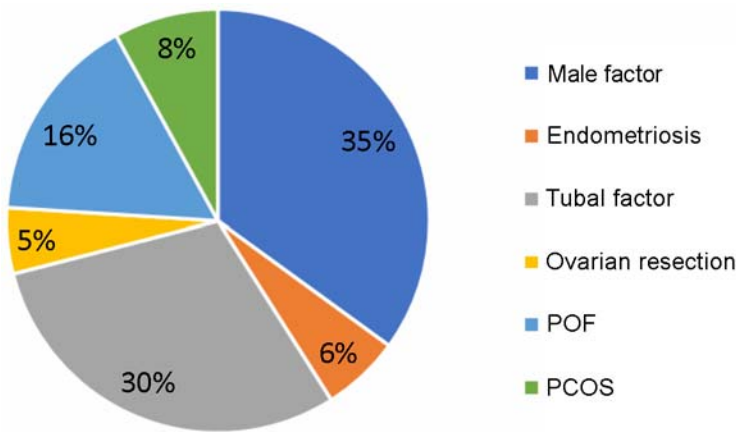

Figure 1S. Factors of infertility in the analyzed IVF treatments.

Table 1S. Average clinical parameters of patients \*.

| Parameter                  |             | Mean ± SD  |
|----------------------------|-------------|------------|
| Age, years                 |             | 32.7 ± 4.1 |
| FSH, mIU/mL                |             | 7.7 ± 2.6  |
| AMH, ng/mL                 |             | 3.0 ± 2.1  |
| TSH, µIU/mL                |             | 1.9 ± 2.0  |
| Number of antral follicles | right ovary | 7.0 ± 3.4  |
|                            | left ovary  | 6.2 ± 4.2  |
| BMI, kg/m²                 |             | 22.9 ± 3.8 |

\* AMH, anti-Müllerian hormone; BMI, body mass index; FSH, follicle stimulating hormone; TSH, thyroid-stimulating hormone.
